## **Delta phase resets mediate non-rhythmic temporal prediction**

Jonathan Daume<sup>a\*</sup>, Peng Wang<sup>a</sup>, Alexander Maye<sup>a</sup>, Dan Zhang<sup>b</sup> and Andreas K. Engel<sup>a</sup>

<sup>a</sup> Department of Neurophysiology and Pathophysiology, University Medical Center Hamburg-Eppendorf, Hamburg, 20246, Germany

<sup>b</sup> Department of Psychology, School of Social Sciences, Tsinghua University, Beijing, 100084, China

---

\* Correspondence: [j.daume@uke.de](mailto:j.daume@uke.de); twitter: [@jonathan\\_daume](#)

## 1 **Abstract**

2       The phase of neural oscillatory activity aligns to the predicted onset of upcoming  
3 stimulation. Whether such phase alignments represent phase resets of underlying neural  
4 oscillations or just rhythmically evoked activity, and whether they can be observed in a  
5 rhythm-free visual context, however, remains unclear. Here, we recorded the  
6 magnetoencephalogram while participants were engaged in a temporal prediction task judging  
7 the visual or tactile reappearance of a uniformly moving stimulus. The prediction conditions  
8 were contrasted with a control condition to dissociate phase adjustments of neural oscillations  
9 from stimulus-driven activity. We observed stronger delta band inter-trial phase consistency  
10 (ITPC) in a network of sensory, parietal and frontal brain areas, but no power increase  
11 reflecting stimulus-driven or prediction-related processes. Delta ITPC further correlated with  
12 prediction performance in the cerebellum and visual cortex. Our results provide evidence that  
13 phase alignments of low-frequency neural oscillations underlie temporal predictions in a non-  
14 rhythmic visual and crossmodal context.

## 15 **Keywords**

16       Temporal prediction; crossmodal prediction; neural oscillations; delta band; beta band;  
17 inter-trial phase coherence; spectral power; phase reset; cerebellum; magnetoencephalography

## 18 Introduction

19 Neural oscillations reflect alternating states of higher or lower neural excitability,  
20 modulating the efficiency by which coupled neurons engage in mutual interactions (Buzsáki,  
21 2006). As a result, neural communication and information processing has been shown to  
22 occur in a phase-dependent manner (Engel et al., 2001; Fries, 2005) reflected, for example, by  
23 fluctuations in perception thresholds correlating with the phase of ongoing oscillations  
24 (VanRullen, 2016). Based on these assumptions, oscillations were also linked to temporal  
25 predictions of upcoming relevant information (Arnal and Giraud, 2012; Engel et al., 2001;  
26 Rimmele et al., 2018). Studies have shown that animals can utilize predictive aspects of  
27 environmental stimuli in a way that reaction times are reduced (Gould et al., 2011; Lakatos et  
28 al., 2008; Rohenkohl and Nobre, 2011; Stefanics et al., 2010) or stimulus processing is  
29 enhanced (Cravo et al., 2013; Wilsch et al., 2015). By means of top-down induced phase  
30 resets of neural oscillations, phases of high excitability might be adjusted towards the  
31 expected onset of relevant upcoming stimulation in order to optimize relevant behavior  
32 (Schroeder and Lakatos, 2009).

33 Due to the rhythmic and therefore temporally highly predictable nature of many auditory  
34 stimuli such as speech or music, particularly in the auditory domain, many studies gathered  
35 evidence that oscillations reset and thereby adjust their phase towards rhythmic stimuli of  
36 various frequencies (Doelling and Poeppel, 2015; Giraud and Poeppel, 2012). Also in the  
37 visual domain, studies showed that neural oscillations align to temporal structure rhythmic  
38 visual input (Breska and Deouell, 2017b; Cravo et al., 2013; Gomez-Ramirez et al., 2011;  
39 Lakatos et al., 2008; Saleh et al., 2010). Other studies, however, reported a specific effect for  
40 visual temporal predictions only in the alpha band (8 – 12 Hz), although sensory input was  
41 provided at lower frequencies (Rohenkohl and Nobre, 2011; Samaha et al., 2015).

42 Moreover, whether temporal predictions indeed involve phase resets of endogenous  
43 neural oscillations remains a matter of debate (Breska and Deouell, 2017a; Doelling et al.,  
44 2019; Novembre and Iannetti, 2018). Despite their ecological relevance, using rhythms for the  
45 investigation of an involvement of oscillations in temporal predictions entails methodological  
46 and conceptual challenges. Rhythmic input leads to a continuous stream of regularly bottom-  
47 up evoked potentials, which are – at least – difficult to distinguish from top-down phase  
48 adjusted neural oscillations within the same frequency. Rather than by phase resets of  
49 endogenous neural oscillations, phase alignments across trials could therefore also be caused  
50 by stimulus-evoked potentials that just appear to be rhythmic during rhythmic stimulation  
51 (Doelling et al., 2019; Novembre and Iannetti, 2018; Zoefel et al., 2018).

52 Temporal prediction processes have further been shown to be reflected by slow buildups  
53 of neural activity, which ramps up until the predicted time point is reached; also called  
54 contingent negative variation (CNV; Breska and Deouell, 2017a; Macar et al., 1999). In a  
55 rhythmic temporal prediction context, such slowly ramping activity between subsequent  
56 stimulus pairs would also lead to significant phase-locking of low-frequency activity across  
57 trials, which again would be very difficult to be distinguished from phase-locking of phase-  
58 aligned endogenous neural oscillations. Conclusive evidence that temporal predictions  
59 involve phase resets of endogenous oscillations rather than stimulus-driven or prediction-  
60 evoked potentials is still lacking.

61 In addition, using only auditory rhythmic stimulation precludes the opportunity to link  
62 phase adjustments to a more general neural mechanism that predicts the temporal structure of  
63 any external input. If phase adjustments form the basis of tracking the temporal regularities of  
64 any relevant information, neural oscillations should align also to predictable temporal  
65 regularities that are inferred from input that does not itself comprise auditory rhythmic or  
66 discrete components, such as, for instance, uniform visual motion.

67 For this reason, we set out to investigate whether phase adjustments of neural activity can  
68 be observed for predictable visual motion stimuli. We measured magnetoencephalography  
69 (MEG) while healthy participants watched a visual stimulus continuously moving across the  
70 screen until it disappeared behind an occluder (Fig. 1A). We manipulated the time for the  
71 stimulus to reappear on the other side of the occluder. The task was to judge whether the  
72 stimulus reappeared too early or too late based on the speed of the stimulus earlier to  
73 disappearance. Hence, participants were required to temporally predict the correct time point  
74 of reappearance to be able to accomplish the task. Participants further performed a control  
75 task, in which the task was to judge the luminance of the reappearing stimulus instead of its  
76 timing. Importantly, physical appearance of both conditions was exactly the same in all  
77 aspects of the stimulation. Any purely stimulus-driven, bottom-up activity should therefore  
78 level out between the two conditions.

79 Moreover, since it has been shown that sensory stimulation can lead to crossmodal phase  
80 adjustments also in relevant but unstimulated other modalities (Lakatos et al., 2007; Mercier  
81 et al., 2013), we further introduced a third condition in which a tactile instead of a visual  
82 stimulus was presented at reappearance. By contrasting it to the luminance matching control  
83 condition, we sought to determine whether phase alignments can be observed in regions  
84 associated with tactile stimulus processing, when sensory information was in fact only  
85 provided to the visual system.

86 We hypothesized that in the two temporal prediction tasks, as compared to the luminance  
87 matching control task, we would observe stronger inter-trial phase consistency (ITPC) within  
88 time windows between disappearance and expected reappearance. These phase alignments  
89 should particularly be observed at low frequencies, e.g., in the delta band, matching the  
90 temporal scale of the disappearance window (on average 1.5 s). Importantly, if such enhanced  
91 ITPC reflected phase resets of ongoing neural oscillations, we should not observe any  
92 changes in delta power during temporal predictions, as the amplitude of phase-resetting  
93 endogenous oscillations should not be altered. On the other hand, when stimulus-driven or  
94 prediction-evoked neural activity lead to the observed phase alignments, observed ITPC  
95 differences should be accompanied with differences in total delta power during temporal  
96 predictions, representing the evoked neural activity in each trial. Further, if the phase of  
97 neural oscillations indeed codes for the time point of the expected reappearance in each  
98 participant, participants showing a more consistent judgment of reappearance timing – as  
99 represented by a steep slope of the psychometric function – should have stronger ITPC during  
100 temporal predictions than participants who performed less accurately. If evoked neural  
101 activity underlies temporal predictions, these correlations should as well be accompanied by  
102 correlations between delta power and the steepness of the psychometric curve within the same  
103 brain region.

## 104 Results

### 105 Behavioral results

106 Participants did not receive feedback about the correctness of their response. This  
107 ensured that participants relied on their individual and subjective “right on time” (ROT)  
108 impression in the temporal prediction conditions and “point of subjective equivalence” (PSE)  
109 in the luminance matching condition. Across participants, there was no statistically significant  
110 bias towards “too early/darker” or “too late/brighter” responses in the visual temporal  
111 prediction ( $\Delta t$  (ROT<sub>V</sub>) = 13.15 ± 155.20 ms;  $t(22) = .41$ ;  $p = .69$ ; Cohen’s  $d = .09$ ) or in the  
112 luminance matching task ( $\Delta$ RGB (PSE) = -1.29 ± 4.54 RGB;  $t(22) = -1.36$ ;  $p = .19$ ; Cohen’s  $d$   
113 = -.28), respectively (Fig. 1B). In the tactile temporal prediction task, participants showed a  
114 significant bias towards “too early” responses ( $\Delta t$  (ROT<sub>T</sub>) = 99.80 ± 150.00 ms;  $t(22) = 3.19$ ;  
115  $p = .004$ ; Cohen’s  $d = .67$ ).

116 To assess whether reaction times were dependent on the timing of the reappearing  
117 stimulus (Fig. 1C), we fitted a mixed-effect model to reaction times from all trials using the  
118 categorical variable *condition* (with the luminance matching task as reference level) and *timing*  
119 *difference* as well as their interaction as predictors. Since in the temporal prediction  
120 conditions we expected reaction times to be slowest for timing differences around zero and  
121 faster for high timing differences, we used a second-order polynomial term for *timing*  
122 *differences* (see Methods). Across all timing differences, reaction times were significantly  
123 faster in the tactile temporal prediction task as compared the luminance matching task ( $\beta = -$   
124 0.26;  $t = 14.21$ ;  $p < 0.001$ ), but not significantly different between the visual temporal  
125 prediction and the luminance matching task ( $\beta = -0.03$ ;  $t = -1.34$ ;  $p = 0.18$ ). Across all  
126 conditions, reaction times linearly decreased with increase timing difference ( $\beta = -0.04$ ;  $t = -$   
127 2.48;  $p = 0.02$ ) as well as showed a quadratic relationship with timing difference ( $\beta = 0.02$ ;  $t =$   
128 2.42;  $p = 0.02$ ). Importantly, as indicated by the interaction results, timing difference had a  
129 stronger negative linear ( $\beta = -0.13$ ;  $t = -10.53$ ;  $p < 0.001$ ) and stronger negative quadratic  
130 influence on reaction times from the visual ( $\beta = -0.11$ ;  $t = -8.18$ ;  $p < 0.001$ ) as well as a  
131 stronger negative quadratic influence on reactions times from the tactile temporal prediction  
132 task ( $\beta = -0.10$ ;  $t = -7.52$ ;  $p < 0.001$ ) as compared to those from the luminance matching task  
133 (see Figure 1C and supplementary table S1 for the complete model output).

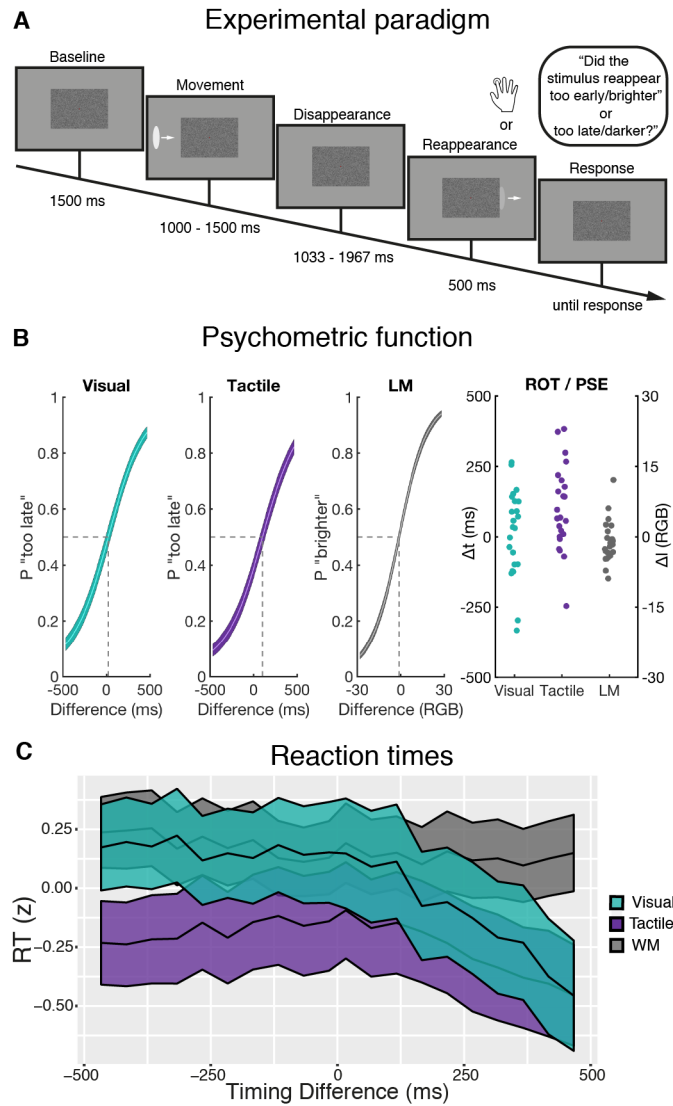

134 **Figure 1. Experimental design and behavioral results.** (A) A stimulus moved towards the center of the screen  
 135 until it disappeared behind an occluder. The task was to judge whether the stimulus reappeared *too early* or *too*  
 136 *late*. In the luminance matching condition, task was to judge whether the luminance became *brighter* or *darker*.  
 137 Importantly, physical stimulation was exactly the same as in the visual prediction task. In the tactile temporal  
 138 prediction task, at reappearance a tactile stimulus was presented contralateral to the disappearance of the visual  
 139 stimulus. (B) Psychometric functions and individual ROT/PSE estimates. A timing difference of 0 refers to the  
 140 objectively correct reappearance of the stimulus after 1,500 ms. Analogously, a luminance difference of 0 refers to  
 141 equal luminance after reappearance provided in RGB values (see Methods). Colored areas depict standard errors  
 142 of the mean (SEM). (C) Log-transformed and standardized reaction times for all timing differences (mean  $\pm$  SEM).  
 143 P = proportion; LM = luminance matching; t = time; l = luminance; RGB = red-green-blue.

## 144 **Temporal prediction was associated with reduced beta power in sensory regions**

145 Analyzing the neural data, we were first interested in investigating which frequency  
146 bands showed modulated spectral power during windows of temporal predictions in order to  
147 narrow down frequency bands of interest for further analyses. For that, we tested an average  
148 of spectral power across all sensors and conditions against a pre-stimulus baseline window.  
149 As a first step, we obtained a general overview of power modulations at each event in the  
150 experimental paradigm. Due to the jittered stimulation built into the design (see Materials and  
151 Methods), we computed cluster-based permutations statistics in three separate time windows  
152 (Fig. 2A) centered on: (a) the onset of the moving stimulus (“Movement”), (b) disappearance  
153 of the stimulus behind the occluder (“Disappearance”), and (c) reappearance of the stimulus  
154 (“Reappearance”).

155 In time bins around movement onset as well as reappearance of the stimulus, but not  
156 around disappearance, clusters of frequencies in the delta and theta range showed a  
157 statistically significant increase of spectral power as compared to the baseline window. All  
158 time windows further depicted a significant decrease of spectral power in frequencies within  
159 the beta and gamma range (all cluster  $p$ -values  $< .008$ ). Importantly, even with using a liberal  
160 cluster alpha level of .05 (one-sided), we did not find a statistically significant modulation of  
161 delta power during the disappearance window. This was also not the case when reducing the  
162 test to sensors from occipital regions only (see Fig. S1).

163 Since we were most interested in examining modulations associated with temporal  
164 predictions, i.e., during the disappearance window, we further compared spectral power  
165 estimates between the temporal prediction tasks and the luminance matching task in all  
166 sensors within the disappearance window while ignoring the other windows. We restricted  
167 our analysis to the classical beta band ranging from 13 to 30 Hz, showing the strongest  
168 modulation as compared to baseline during the disappearance window. Cluster-based  
169 permutation statistics revealed reduced beta power during visual temporal prediction in  
170 occipital sensors during all time-bins of the disappearance window (cluster- $p = .01$ ). Source  
171 level statistics revealed a statistically significant decrease of beta power in a cluster of  
172 bilateral occipital voxels (cluster- $p = .01$ ). Beta power was further reduced during tactile  
173 prediction in a cluster of occipital as well as left lateralized frontocentral sensors (cluster- $p =$   
174  $.002$ ). At source level, a significant power reduction in the beta band was most strongly  
175 apparent in parts of bilateral visual as well as left-lateralized somatosensory cortex (cluster- $p$   
176  $= .01$ ).

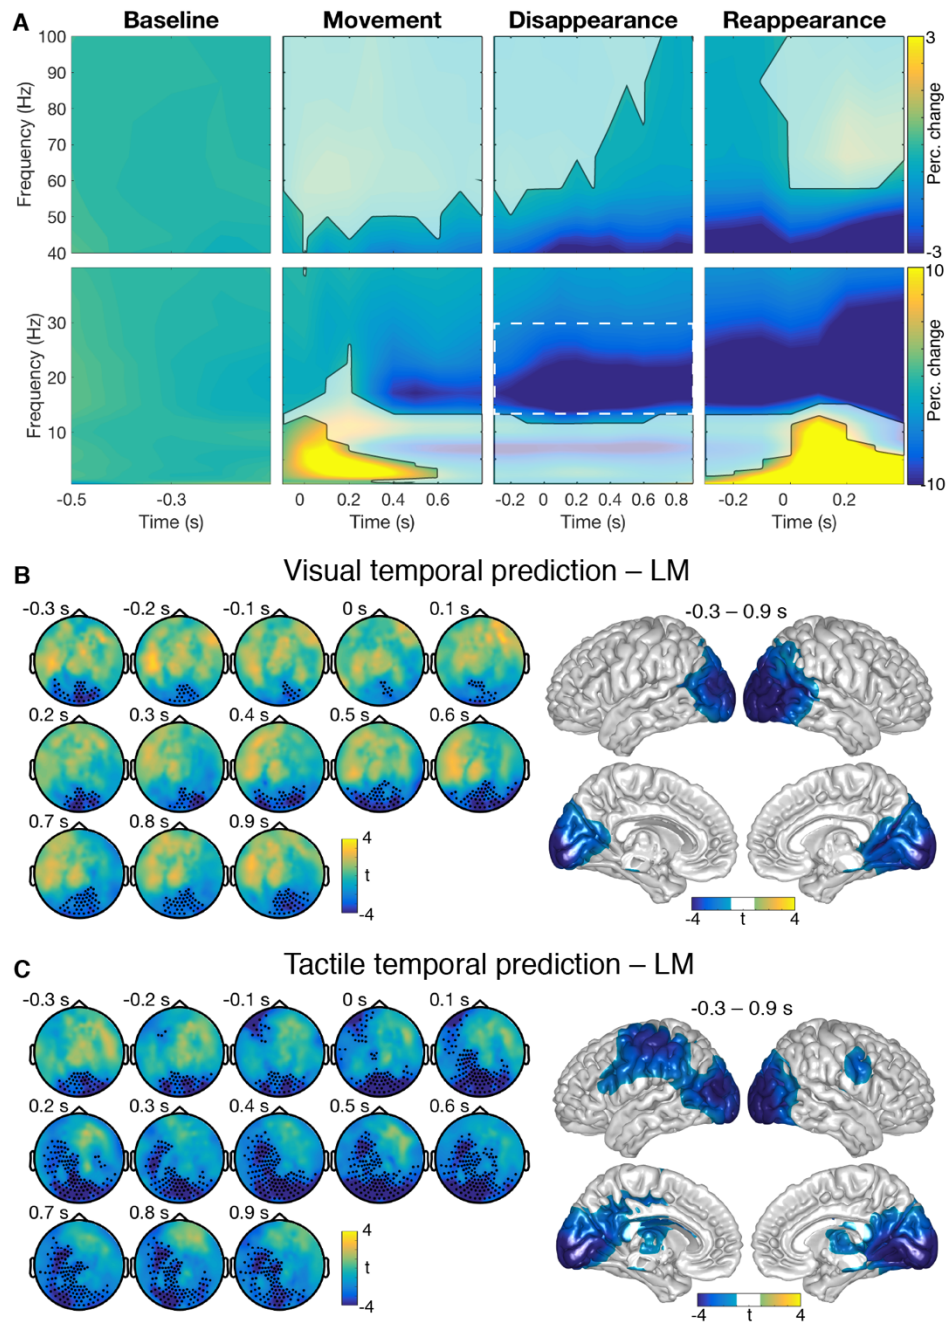

177 **Figure 2. Power modulations during temporal prediction.** (A) Spectral power averaged across sensors,  
178 conditions, and participants. Each window was centered on the different events within the paradigm and  
179 normalized with pre-stimulus baseline. Time 0 refers to the onset of each event. Cluster-based permutation  
180 statistics revealed significant power modulations as compared to baseline (unmasked colors). See also Fig. S1.  
181 (B,C) Difference between the two temporal prediction and the luminance matching task, respectively, within the  
182 beta band (13 – 30 Hz) in time bins around stimulus disappearance. Black dots indicate sensors of the clusters  
183 showing significant differences between the conditions. At source level, cluster-based permutation statistics  
184 revealed cluster of voxels showing significant differences between the conditions (colored voxels). LM =  
185 luminance matching.



## 186 **Delta inter-trial phase consistency was enhanced during temporal prediction**

187 For the analysis of ITPC, we followed a similar approach. First, we tested ITPC  
188 differences to baseline in the three time windows for an average across all sensors and  
189 conditions using cluster-based permutation statistics. ITPC was significantly increased across  
190 a range of different frequencies in time bins around movement onset, disappearance and  
191 reappearance of the stimulus (all cluster- $p < .001$ ; Fig. 3A). For time windows centered on  
192 movement onset as well as reappearance significant ITPC increases were strongest in the  
193 delta to alpha range. At disappearance of the stimulus, significant ITPC increases were  
194 observed up to the low beta range with strongest increases in the delta band.

195 Hence, the delta band showed no increase in power but the strongest increase in ITPC as  
196 compared to baseline during the disappearance window for an average across all conditions  
197 (see Fig. 2A, 3A, and S1). For further statistical comparisons between conditions, we  
198 therefore restricted our analyses to an average of frequencies between 0.5 to 3 Hz (for  
199 condition-specific delta band ITPC differences to baseline during disappearance, see Fig. S2).  
200 For a better estimation of when differences in ITPC between the conditions became apparent,  
201 we enlarged the analysis of ITPC to time bins ranging from -1,900 ms to 1,900 ms centered  
202 on the disappearance of the stimulus. Note that in this enlarged analysis window the timing of  
203 the movement onset as well as the reappearance of the stimulus strongly jittered across trials.  
204 The effect of these events on ITPC estimates were thus strongly reduced (see Fig. S3).

205 We found two clusters that showed significantly stronger ITPC during visual temporal  
206 predictions as compared to luminance matching (Fig. 3B). One cluster included sensors from  
207 right temporal, frontal and occipital regions in time bins from -400 to 1,900 ms (cluster  $p <$   
208  $.001$ ). The second cluster included left frontotemporal sensors in time bins ranging from 0 to  
209 1,900 ms (cluster  $p = .01$ ) Source level analysis revealed that for an average of the time  
210 window from -400 to 1,900 ms ITPC differences between the two conditions were strongest  
211 in right-lateralized central and inferior frontal voxels (cluster  $p < .001$ ).

212 ITPC was also significantly enhanced in bilateral temporal sensors during tactile  
213 temporal predictions, evolving around -400 ms in right temporal sensors and shifting towards  
214 left hemisphere with ongoing disappearance time (cluster  $p < .001$ ; Fig. 3C). In this contrast,  
215 however, differences in ITPC were more strongly apparent also in frontal and central sensors.  
216 Besides strongest differences in ITPC again in right superior parietal and inferior frontal  
217 voxels, source level analysis also revealed strong differences in bilateral somatosensory  
218 voxels for the contrast of tactile prediction to luminance matching (cluster  $p < .001$ ).

219 Figure 3D depicts absolute delta ITPC estimates for all three conditions in the enlarged  
220 disappearance time window. Values were averaged across participants and all the sensors that  
221 exhibited the top 20% of t values in the ITPC contrast between visual temporal prediction and  
222 luminance matching between 0 and 1,500 ms (see Fig. 3B; similar results were obtained for  
223 sensors showing the top 10% or 5% of t values, see Fig. S3D). ITPC initially increased for all  
224 three conditions, but dropped down to stimulus movement level shortly afterwards in the  
225 luminance matching condition. ITPC in the visual as well as tactile temporal prediction tasks  
226 stayed elevated throughout the entire disappearance window.

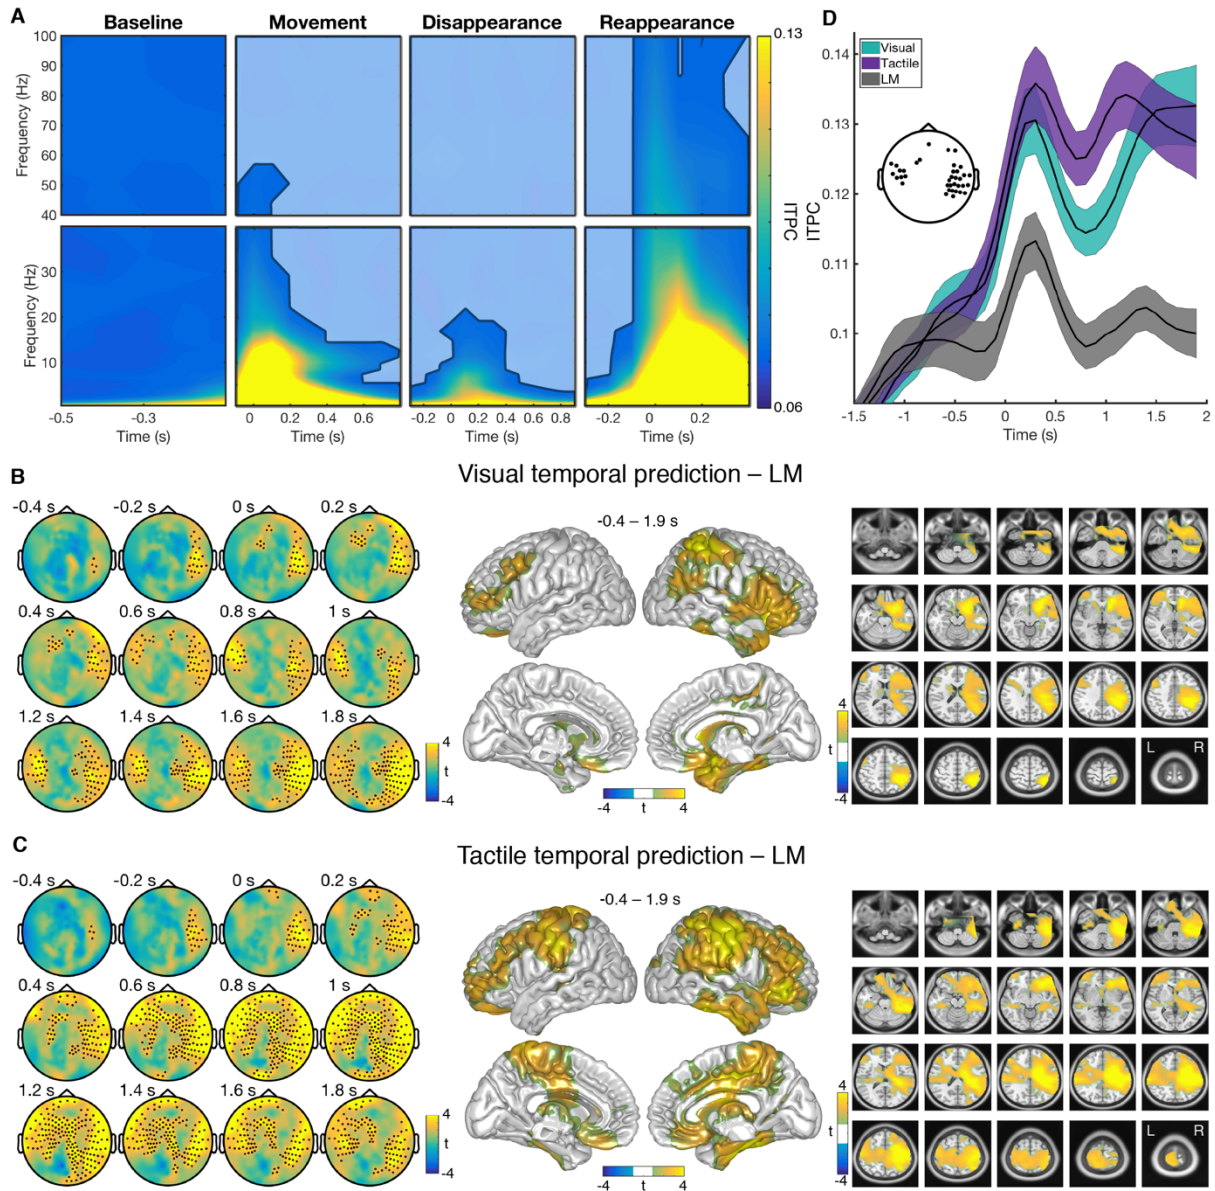

227 **Figure 3. ITPC during temporal prediction as compared to luminance matching.** (A) ITPC estimates  
 228 averaged across sensors, conditions, and participants. Masked colors refer to non-significant ITPC modulations as  
 229 compared to baseline (cluster-based permutation statistics). (B,C) Difference in ITPC between the visual or tactile  
 230 prediction and the luminance matching task, respectively, within the delta band (0.5 – 3 Hz). For clarity, only  
 231 every second time bin was plotted. Black dots indicate sensors of the clusters showing significant differences. On  
 232 source level, clusters of voxels showing significant differences between the conditions are colored. See also Fig.  
 233 S2 and S3 (D) Time course of absolute delta ITPC estimates within each condition for time bins centered around  
 234 disappearance of the stimulus (time 0; mean  $\pm$  SEM). ITPC estimates were averaged across channels that showed  
 235 the top 20% of t-values for the comparison of the visual prediction with the luminance matching task (see  
 236 topography). LM = luminance matching.

### 237 Control analyses on delta power differences between conditions

238 In contrast to ITPC, delta power did not significantly increase with disappearance of the  
 239 stimulus in an average across conditions and channels as compared to baseline (see Fig. 2A  
 240 and S1). Nevertheless, to examine whether channels showing the strongest differences in  
 241 ITPC between conditions also show differences in delta power, we averaged delta power  
 242 within the channels showing the strongest ITPC differences (same as in Fig. 3D) and

243 compared power values from each of the two temporal prediction conditions with the  
244 luminance matching condition, respectively, within the same enlarged window of -1.900 to  
245 1.900 ms around stimulus disappearance (Fig. 4).

246 Figure 4A shows the time courses of total delta power in each condition. The overall  
247 pattern of the delta power time courses was largely different to the pattern of the ITPC time  
248 course in each of the conditions (compare to Fig 3D). In the visual temporal condition task as  
249 well as in the luminance matching task, delta power did not increase around disappearance of  
250 the stimulus and did not differ in any of the time bins between the two conditions during the  
251 disappearance window (even for uncorrected t-tests). Also in the tactile condition, delta power  
252 did not increase at around disappearance of the stimulus as observed for ITPC in this  
253 condition. However, it strongly increased in late time windows, showing significant  
254 differences in the tactile conditions as compared to the luminance matching task in time bins  
255 between 700 and 1900 ms after disappearance (cluster  $p < .001$ , dashed black line in Fig. 4A).

256 The combined pattern of an early delta ITPC increase and a late delta power increase in  
257 this condition could speak in favor of a CNV underlying the processes of temporal prediction.  
258 A CNV describes activity that is building up until the expected time point of an upcoming  
259 event is reached. After this time point, the build-up process sharply terminates (see, e.g.  
260 Breska and Deouell, 2017a; Macar et al., 1999). In such a scenario, ITPC would be increased  
261 as soon as the slow build-up process initiates (here at disappearance), but power increases  
262 might become observable only later in the prediction process. A phase-reset of ongoing  
263 oscillations, on the other hand, should not lead to an increase in delta power during the  
264 disappearance window.

265 To further investigate whether a CNV could explain the observed pattern of ITPC and  
266 power time courses, we computed additional control analyses. If a CNV would explain the  
267 increase in total power in the tactile condition, it should be locked to the disappearance of the  
268 stimulus and be present in each temporal prediction trial. Consequently, it should also be  
269 removed when subtracting the ERF from each trial in the time domain, before computing  
270 delta power in each single trial (i.e., when computing induced power). However, as the upper  
271 panel in Figure 4B shows, even after removing the ERF from each trial, delta power in the  
272 tactile condition was still strongly increased as compared to the luminance matching task in  
273 late disappearance time windows (cluster  $p < .001$ ). Delta ITPC, on the other hand, was  
274 completely removed after subtracting the ERF (Fig. 4B lower panel).

275 Figure 4C depicts the delta power time course of the ERF itself in each condition. Delta  
276 power of the ERF increased for both, the tactile as well as the visual temporal prediction task,  
277 as compared to the control task. Similar to the ITPC effect, this increase already started in  
278 time bins shortly before disappearance (both cluster  $p < .001$ ). Moreover, the strength of the  
279 increase in power in the visual temporal prediction task resembles the increase in the tactile  
280 task, and was not much stronger in the tactile task as observed for total power (Fig. 4A).

281 As a next step, we computed two mixed-effect regression models to examine the effect of  
282 delta power on ITC. In one model, we used the variables *condition* and *time* as well as their  
283 interaction as predictors for ITPC only (Fig. 4D upper panel). In the other, we also added  
284 delta power as a covariate to the model in order to adjust for the variance explained by delta  
285 power (lower panel). After adding delta power as covariate, predicted ITPC values were  
286 reduced in the tactile prediction condition during late time windows of disappearance.  
287 However, they were still significantly different between both the visual and the tactile  
288 temporal prediction as compared to the luminance matching task, respectively, in all time bins  
289 during disappearance (see supplementary Table S2 for a complete model output).

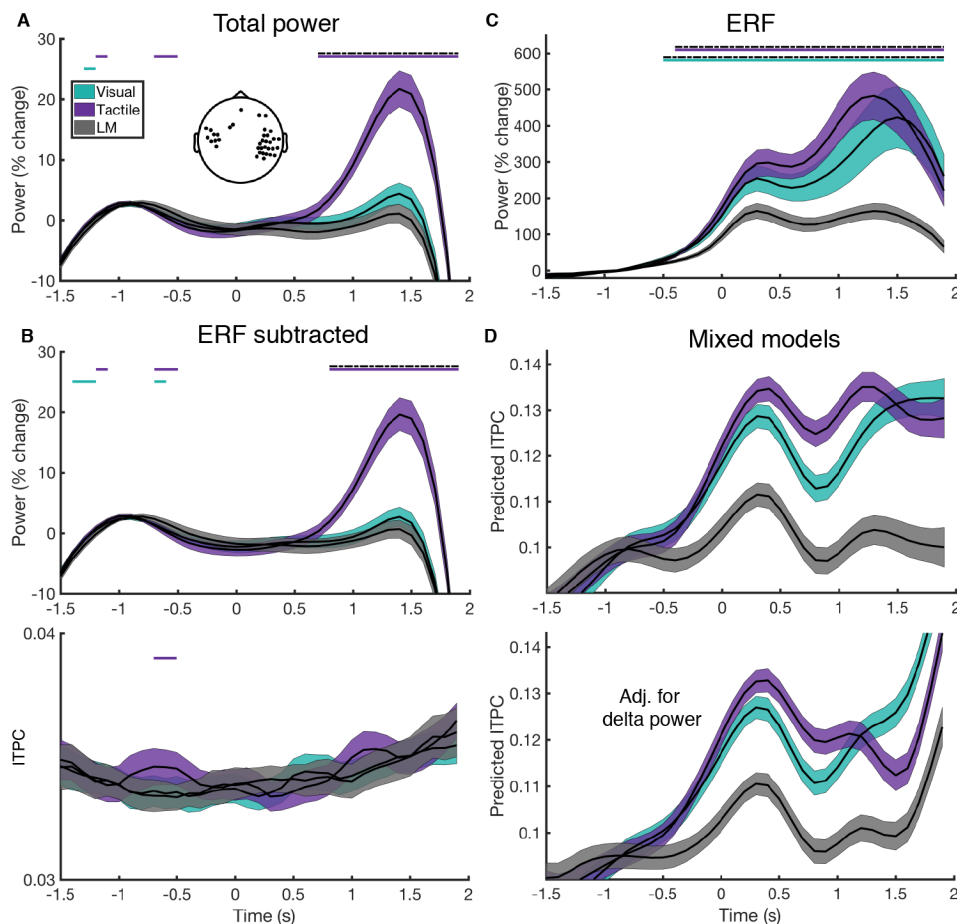

290 **Figure 4. Delta power control analyses.** (A) Time course of total delta power (0.5 – 3 Hz) in all conditions for  
 291 the channels showing the strongest delta ITPC effect (same as in Fig. 3D). Time point 0 again refers to the complete  
 292 disappearance of the stimulus. Colored lines depict uncorrected p-values below 0.05 from comparisons of the  
 293 respective temporal prediction condition with the luminance matching task in each time bin. Dashed black lines  
 294 depict p-values that survived the cluster-based permutation test. (B) The upper panel depicts the time course of  
 295 induced delta power in each condition after a condition-wise subtraction of the ERF from each trial in the time  
 296 domain. The lower panel depicts ITPC in each condition after ERF subtraction. (C) Delta power time course of  
 297 the ERF, i.e., after averaging all trials in each condition in the time domain first. (D) Predicted delta ITPC values  
 298 from mixed-effects regression models with an interaction term of *condition* and *time* as predictors for ITPC. Upper  
 299 panel: without adjusting for delta power; lower panel: with adjusting for delta power by adding power as a  
 300 covariate to the model. For a better comparability, standardized ITPC values were back-transformed to the original  
 301 scale prior to plotting.

## 302 **Delta ITPC, but not delta power, correlated to behavioral performance**

303 We further hypothesized that if phase alignments of neural oscillations were indeed  
 304 associated with temporal predictions, a participant who judged the reappearance of the  
 305 stimulus within her individual subjectively correct ROT framework in a consistent manner  
 306 should also exhibit stronger ITPC during temporal predictions, as a consistent timing  
 307 judgement across trials should involve a similar phase across trials. The consistency of  
 308 judgements can be inferred from the steepness of the psychometric function – the steeper the  
 309 psychometric function, the more consistent the answers of the participant. We computed  
 310 Pearson correlations of source level delta ITPC with the steepness of the psychometric  
 311 function across participants and found statistically significant positive correlations in the  
 312 visual (cluster  $p = .003$ ) as well as in the tactile temporal prediction task (cluster  $p = .002$ ; Fig.  
 313 5). Strongest correlations were found in the cerebellum and right lateralized early visual areas

314 in both tasks. No clusters showing significant positive or negative correlations were observed  
315 in the luminance matching task (all cluster  $p > .1$ ). If such correlations between phase  
316 alignments and behavior are related to evoked neural activity during temporal predictions,  
317 however, we should also observe similar correlation also between delta power and behavior.  
318 Hence, we averaged delta power within the voxels that showed the correlations between ITPC  
319 and behavior and computed Pearson correlations between this average and the steepness of  
320 the slope in each condition. We found no significant correlation between delta power and  
321 behavior in the visual ( $r = 0.31, p = 0.15$ ) nor in the tactile temporal prediction task ( $r = 0.16,$   
322  $p = 0.47$ ).

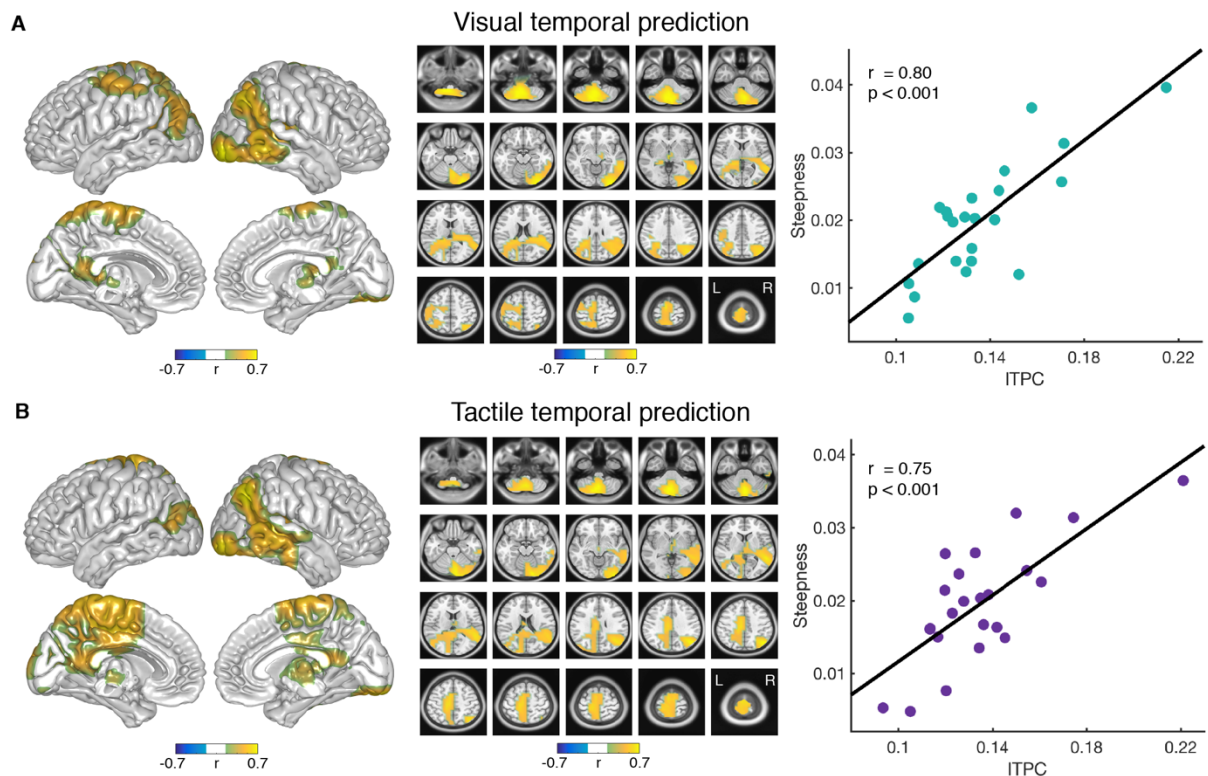

323 **Figure 5. Correlation of ITPC to behavior.** (A,B) Correlation of individual ITPC estimates with the individual  
324 steepness of the psychometric function within all voxels, shown in (A) for the visual prediction, and in (B) for the  
325 tactile prediction condition. ITPC estimates were averaged within the delta band and time windows of 0 to 1,000  
326 ms centered on the disappearance of the stimulus. Only the clusters of voxels showing significant correlations are  
327 colored. In the scatter plots, each dot represents one participant and ITPC estimates were averaged across all  
328 voxels within the clusters of significant correlations. There was no significant correlation observed for the  
329 luminance matching condition or between delta power and behavior.

### 330 ITPC did not correlate with eye movements

331 A potential confound for the observed effects in ITPC could be that participants tracked  
332 the moving stimulus with their eyes to be able to judge the correct time point of reappearance.  
333 Thus, consistent horizontal eye movements with the speed of the stimulus might lead to  
334 enhanced ITPC in the delta band. To make sure that differences in eye movements do not  
335 explain the observed differences in ITPC between the conditions, we analyzed horizontal eye  
336 movements recorded by an eye tracker (ET) during the MEG measurement. Figure 6A depicts  
337 condition-wise horizontal eye positions averaged across all participants and centered on the  
338 disappearance of the stimulus, showing no systematic differences between the conditions.

339 Moreover, if horizontal eye movements would explain the effects in ITPC, we should observe  
340 the same effects between the conditions when we compute ITPC for the ET data. Differences  
341 in ITPC between the two temporal prediction conditions and the luminance matching  
342 condition are depicted Figure 6B and C. Using cluster-based permutation statistics, we did not  
343 observe any time-frequency cluster that revealed significant differences between the  
344 conditions (all cluster  $p > .1$ ).

345 Further, we tested whether there are any significant correlations between individual ITPC  
346 values obtained from the MEG data and from the ET data. We averaged ITPC values from a  
347 time window of 0 to 1.000 ms and again used the top 20% of channels showing the strongest  
348 effect for ITPC for the MEG data (for channels see Fig. 3D), and did not observe significant  
349 correlations between the ITPC values obtained from MEG and ET data in the temporal  
350 prediction tasks (Fig. 6D). The strongest correlation was found in the luminance matching  
351 condition, which suggests that the ITPC differences found in the MEG data cannot be  
352 explained by horizontal eye movements during temporal predictions.

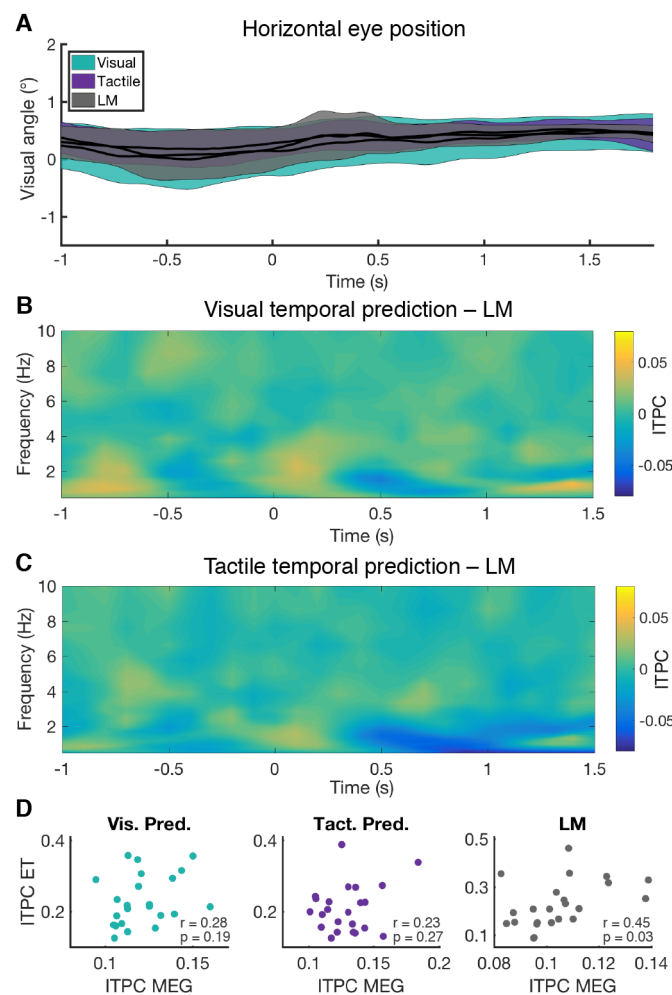

353 **Figure 6. Analysis of horizontal eye movements.** (A) Condition-wise eye positions centered on stimulus  
354 disappearance (time 0 s) and averaged across all participants. A visual angle of  $0^\circ$  refers to the fixation dot ( $1^\circ$   
355 visual angle roughly corresponds to 1 cm on the screen). Colored areas depict SEM. (B,C) Differences in ITPC  
356 between (B) the visual prediction and (C) the tactile prediction condition to the luminance matching  
357 condition in low frequencies and time bins around disappearance of the stimulus (time 0 s). Utilizing cluster-permutation  
358 statistics, no clusters of significant differences were observed between the conditions. (D) Condition-wise  
359 correlations between ITPC estimates obtained from the eye tracker data and the MEG sensors across all  
360 participants. ET = eye tracker.

## 361 **Discussion**

362 Our task design enabled us to disentangle phase resets of ongoing neural oscillations  
363 from evoked event-related potentials. We found that phase alignments, but not power, were  
364 stronger in the context of temporal predictions than in a task where temporal structure was  
365 less relevant. This supports the hypothesis that phase adjustments of ongoing neural  
366 oscillations, and not stimulus-driven or prediction-evoked activity, form the neuronal basis of  
367 temporal prediction processes and suggest that this framework can be extended to predictions  
368 that have to be inferred from stimulation that does not itself comprise rhythmic and discrete  
369 components. The strength of the observed phase adjustments further correlated with the  
370 ability to consistently judge the temporal reappearance of the stimulus across participants,  
371 suggesting also a functional relevance of the observed phase adjustments for temporal  
372 predictions.

### 373 **Cross-modal temporal predictions are reflected by a beta power reduction in both** 374 **sensory systems**

375 It has been suggested that temporal predictions of upcoming events might be mediated by  
376 neuronal oscillations in the delta and beta frequency range (Arnal and Giraud, 2012). The  
377 enhanced phase consistency of delta oscillations as well as the power modulations in the beta  
378 band observed in the current study are in line with this hypothesis. However, earlier reports  
379 on beta power modulations during temporal predictions are inconsistent. On the one hand,  
380 studies found that beta power was even increased shortly before the onset of the expected  
381 stimulus in auditory (Arnal et al., 2015) and visual rhythmic stimulation (Saleh et al., 2010).  
382 On the other hand, van Ede et al. (van Ede et al., 2011) found that predicting the onset of a  
383 tactile stimulus was specifically associated with a reduction of beta power in contralateral  
384 tactile areas and accompanied by faster reaction times. The authors suggest that a reduction in  
385 beta power might signal preparatory processes in the sensory system that expects the  
386 upcoming event.

387 The observed decrease in beta power in task-relevant sensory regions in the current study  
388 largely match the results reported by van Ede et al. (van Ede et al., 2011). During visual  
389 temporal predictions, beta band power was reduced in visual sensory regions as compared to  
390 the visual control condition during the entire disappearance time. During crossmodal  
391 predictions, in which temporal information was provided to the visual system, but  
392 reappearance was expected in the tactile domain, beta band power was decreased in both,  
393 visual as well as tactile regions.

394 Since also in the luminance matching condition participants expected to perceive a visual  
395 stimulus, preparatory processes alone cannot explain this reduction in beta power. This is  
396 especially the case in the crossmodal condition, in which no visual stimulus was expected, but  
397 stronger decreases in beta were also observed in visual areas. Moreover, since we observed  
398 beta decreases also in tactile regions at the time of visual stimulus disappearance, the decrease  
399 could not solely be an effect of external stimulation.

400 Beta decreases observed during temporal predictions might therefore relate to more than  
401 only preparatory processes to an upcoming stimulus. Cross-modal decreases in beta band  
402 activity in both the temporal information providing visual as well as the stimulation expecting  
403 tactile system might reflect that both sensory modalities are continuously involved in  
404 temporal prediction processes, not only in processes preparing for the upcoming stimulation.  
405 We found no significant increases in beta power during temporal predictions. Whether  
406 decreases in beta power are associated with non-rhythmic temporal predictions while

407 increases might reflect temporal predictions during rhythmic stimulation, remains subject to  
408 future research.

#### 409 **Enhanced ITPC cannot be explained by event-related increases in neural activity**

410 In earlier investigations of phase adjustments to external predictive stimulation,  
411 participants were mostly presented with streams of auditory rhythmic input. Rhythmic and  
412 discrete input, however, also causes strongly evoked brain activity within the same frequency  
413 range, which makes it difficult to disentangle streams of evoked activity from entrained  
414 endogenous neural oscillations (Novembre and Iannetti, 2018; Zoefel et al., 2018). Our results  
415 provide evidence that phase alignments of low-frequency fluctuations observed during  
416 temporal predictions cannot solely be explained by stimulus-driven, bottom-up evoked brain  
417 activity (see also, Doelling et al., 2019; Kösem et al., 2018). In the current study, we aimed at  
418 reducing stimulus-evoked brain responses to a minimum by presenting participants with a  
419 continuously moving stimulus instead of several discrete stimuli. We were particularly  
420 interested in the time point at which the stimulus transiently disappeared behind an occluder  
421 (as opposed to sharp onsets and offsets in discrete rhythmic stimulation). At disappearance,  
422 we did not observe an increase in low-frequency power as compared to pre-stimulus baseline  
423 in any of the conditions, which could explain an increase of phase alignments after  
424 disappearance of the stimulus. Moreover, by using an experimental design in which physical  
425 stimulation at disappearance was exactly the same during temporal predictions as well as the  
426 control condition, we controlled for brain responses that could have been driven by bottom-  
427 up, stimulus-processing activity and would therefore not be specific to temporal predictions.  
428 Importantly, delta ITPC, but not power, was stronger during temporal predictions at and after  
429 disappearance of the stimulus, suggesting that delta phase alignments during temporal  
430 predictions cannot be solely related to brain responses evoked by the offset of the visual  
431 movement.

432 It has been further suggested that a CNV, i.e., activity that is ramping up until the  
433 expected time point is reached, might underlie enhanced phase alignments during temporal  
434 predictions (Breska and Deouell, 2017a). CNVs have often been observed in timing tasks  
435 (e.g., Macar et al., 1999; Pfeuty et al., 2003; Praamstra et al., 2006), and such ramping  
436 activity initialized by temporal predictions would, besides an increase in power, also lead to  
437 increased phase alignments as reflected by enhanced ITPC during temporal predictions. These  
438 increases in activity are therefore not caused by the physical stimulation itself but specifically  
439 related to temporal predictions. As described above, the observed pattern of an early delta  
440 ITPC increase and a late delta power increase in our tactile prediction condition could speak  
441 in favor of a CNV underlying the processes of temporal prediction (see Fig. 3D and 4A).  
442 However, there are several aspects that argue against an involvement of a CNV in our data.

443 First of all, if in our data a CNV underlay temporal predictions, we should have observed  
444 a late power increase also in the visual temporal prediction task, in which participants also  
445 focused temporal predictions but saw the exact same physical stimulation as in the control  
446 task. Even using uncorrected t-tests, however, we did not observe total delta power  
447 differences between the two conditions in any of the time bins after stimulus disappearance.  
448 Since we see strong ITPC increases in both temporal prediction condition, but a delta power  
449 increase only in the tactile condition, it is unlikely that CNV-like activity would explain the  
450 phase alignments observed in *both* temporal predictions tasks.

451 Moreover, by subtracting the ERF from each single trial, all activity that is phase-locked  
452 to the disappearance of the stimulus should be removed from the data, that is, all activity  
453 related to a phase-reset of oscillations *as well as* all activity reflecting event-related potentials.  
454 However, also after subtracting the ERF, the strong delta increase in the tactile condition was



455 still observable. This suggests that the increase in power in the tactile condition was not  
456 associated to the temporal prediction processes locked to the disappearance of the stimulus.  
457 Since the reappearance of the stimulus strongly jittered in relation to the time point of  
458 disappearance and the tactile condition was the only condition in which a sharp-onsetting  
459 tactile stimulus was presented, it is likely that this delta power increase in late windows was  
460 caused by the presentation of the tactile stimulus. In contrast to power, however, delta ITPC  
461 was completely removed after subtracting the ERF, which confirms that subtracting the ERF  
462 reliably removed all disappearance-locked activity.

463 Further, as stated above, averaging across all trials, i.e., computing the ERF, would  
464 capture all activity from each trial which is locked to disappearance of the stimulus, i.e.,  
465 phase-reset oscillatory activity and/or event-related potentials. In contrast, unlocked activity  
466 should be removed by the averaging. If a CNV caused the late power increase in the tactile  
467 condition, this pattern of a late increase in power should also be observable for the power time  
468 course of the ERF. A phase-reset of oscillatory activity, on the other hand, would rather cause  
469 an ERF power time course that shows differences already at early time windows of the  
470 disappearance, as is the case in our data. The time course of delta power of the ERFs,  
471 therefore, speak against a CNV representing the power increase but, rather, for oscillatory  
472 activity that resets its phase at disappearance.

473 Therefore, instead of a CNV causing phase alignments of slow fluctuations across trials  
474 (as described above) the opposite might hold, i.e., phase resets of oscillatory activity might  
475 actually, after averaging, lead to results erroneously suggesting a CNV. If so, studies that  
476 observed a CNV after averaging, could have in fact also extracted all oscillatory activity that  
477 has reset its phase after the onset of a temporal cue. Only if a CNV was present in single trial  
478 data, and not only after averaging, such event-related slow fluctuations would indeed relate to  
479 single trial temporal predictions. In our data, however, we did not observe a temporal  
480 prediction related increase in *total* delta power, which is computed on single trial time courses  
481 *before* averaging. An increase in power was only visible *after* averaging all trials in the time  
482 domain first. Thus, the lack of a power increase in total power together with a CNV-like  
483 power increase after averaging across trials suggests that neural oscillations reset their phase  
484 according to the temporal structure of the stimulation, but did not alter in amplitude on a  
485 single trials basis.

486 Taken together, we observed strong ITPC differences between the conditions but no  
487 (total) power differences that could be explained by event-related potentials such as a CNV.  
488 Instead of evoked or CNV-like activity, our results therefore suggest that the phase  
489 alignments observed during temporal predictions are associated to neural oscillations that  
490 adjusted their phase to the temporal structure of the stimulation in order to predict the  
491 reappearance of the upcoming stimulation.

## 492 **Neural oscillations at low frequencies adapt to the temporal structure of non-rhythmic** 493 **visual motion stimulation**

494 Earlier studies have observed that neural oscillations entrain towards rhythmic sensory  
495 input to track the low-frequency temporal regularities of the stimulation, especially in the  
496 auditory domain (Giraud and Poeppel, 2012). Such phase entrainment does not only occur in  
497 the delta band but can flexibly adapt to the frequency of the external input also at higher  
498 frequencies such as the theta or the alpha band during auditory stimulation (Doelling and  
499 Poeppel, 2015). However, in the visual system, evidence for the tracking of temporally  
500 predictive input by neural oscillations is not as clear. On the one hand, studies showed that the  
501 phase of neural oscillations is involved in temporal predictions of low-frequency visual input  
502 (Breska and Deouell, 2017a; Cravo et al., 2013; Saleh et al., 2010; Wilsch et al., 2015). On

503 the other hand, studies suggested that temporal predictions in the visual system were specific  
504 to the alpha band, although sensory input was provided at lower frequencies (Rohenkohl and  
505 Nobre, 2011; Samaha et al., 2015). Rohenkohl and Nobre (Rohenkohl and Nobre, 2011), for  
506 instance, used rhythmically presented visual stimuli at 2.5 and 1.25 Hz moving across the  
507 screen until it disappeared behind an occluder. Nevertheless, neural oscillations exclusively  
508 from the alpha band showed modulated activity associated with temporal predictions during  
509 the disappearance time. They found no phase locking of oscillations in lower frequencies.

510 In the current study, we provide further evidence that neural oscillations from the delta  
511 band show enhanced phase alignment during visual temporal predictions across trials. In  
512 order to adapt to the temporal regularity of the presented visual stimulus, delta frequencies in  
513 a wide network of parietal and frontal brain areas exerted more consistent phase resets at  
514 around the time point of disappearance of a monotonically moving stimulus as compared to a  
515 luminance matching control condition. The strength of this phase adjustment in each  
516 participant correlated with the consistency in judging a reappearance of the visual stimulus as  
517 too early or too late. This was the case only in the temporal prediction tasks, which underlines  
518 the behavioral relevance of the observed phase adjustments for temporal predictions.

519 Importantly, our study suggests that the mechanism of phase adjustments for temporal  
520 predictions can be extended to external stimulation that does not as such involve rhythmic or  
521 discontinuous stimulation. We found that low-frequency oscillations can adjust their phase  
522 also to the temporal structure of external stimulation that had to be inferred from uniform  
523 visual motion. This is also in line with recent studies reporting enhanced performance as well  
524 as an involvement of delta phase for non-rhythmic, yet predictable stimulation in the auditory  
525 (Herbst and Obleser, 2019) as well as the visual domain (Breska and Deouell, 2017a; but see  
526 Obleser et al., 2017 and Breska and Deouell, 2017b for a discussion about the rhythmicity of  
527 their non-rhythmic visual stimulation). While both studies involve onsets of discrete stimuli,  
528 they show that delta phase was involved in temporal prediction processes during stimulation  
529 that was not itself purely rhythmic. By showing that the phase of neural oscillations also align  
530 to a rhythm-free, non-discrete, unimodal visual as well as crossmodal visuotactile stimulation,  
531 our results further indicate that the framework of phase adjustments during temporal  
532 predictions might be generalized also to other, if not all, forms of temporally predictive  
533 external stimulation.

#### 534 **Phase resets occurred in a network of frontoparietal and sensory brain areas**

535 We observed enhanced ITPC values in a network of mostly frontal and parietal brain  
536 areas during visual as well as crossmodal temporal predictions. Similarly, Besle et al. (2011)  
537 observed significant phase entrainment to audiovisual stimulation in a wide network of  
538 distributed areas including parietal and inferior frontal areas. These observations support the  
539 notion that brain areas involved in temporal predictions may constitute a frontoparietal timing  
540 network (Coull and Nobre, 2008; Rimmele et al., 2018).

541 Further, we found enhanced ITPC values also in early somatosensory areas contralateral  
542 to the disappearance of the purely visual stimulus during crossmodal temporal predictions,  
543 despite the fact that prediction-relevant information was provided only by a moving visual  
544 stimulus. This supports evidence reported earlier showing that stimulation within one  
545 modality can crossmodally reset the phase of ongoing low-frequency in other modalities,  
546 which might be an important mechanism for multisensory integration processes (Lakatos et  
547 al., 2007; Mercier et al., 2013).

548 Similarly, we expected to find enhanced ITPC during temporal predictions in early visual  
549 areas. In fact, increased delta ITPC as compared to baseline were also observed in occipital

550 sensors (see Fig. S2), but they were not significantly different between the conditions.  
551 However, we found that voxels in early visual areas showed strong correlations between  
552 individual ITPC estimates and the steepness of the psychometric function in both temporal  
553 prediction tasks, but not in the luminance matching task. This suggests that consistent phase  
554 resets of delta oscillations within visual areas might have supported consistent timing  
555 judgments with the participants' subjective timing frameworks. This indicates an involvement  
556 also of the visual system in processes related to temporal prediction.

557 Moreover, strong correlations between ITPC and behavior were also observed in the  
558 cerebellum, supporting earlier reports on a involvement of the cerebellum in temporal  
559 prediction processes (Breska and Ivry, 2016). Roth and coworkers (Roth et al., 2013), for  
560 instance, found that cerebellar patients were significantly impaired in recalibrating sensory  
561 temporal predictions of a reappearing visual stimulus. This finding is of particular interest as  
562 we adapted the authors' experimental paradigm for the use in the current study. Theirs and  
563 our results therefore indicate that the cerebellum might be crucially involved in accurate and  
564 consistent judgments of temporal regularities deployed in perceiving object motion.

## 565 **Conclusions**

566 We provide evidence that the phase of neural oscillations can adjust to the temporal  
567 regularities of external stimulation and do not arise as a byproduct of stimulus-driven or  
568 prediction-related evoked potentials. Such phase alignments could provide a key mechanism  
569 that predicts the onset of upcoming events in order to optimize processing of relevant  
570 information and thereby adapt behavior. We show that temporal information provided to one  
571 modality leads to phase adjustments in another modality when crossmodal temporal  
572 predictions are necessary, providing further evidence that such crossmodal phase resets could  
573 be the neuronal basis of multisensory integration processes. Moreover, phase alignments were  
574 observed for unimodal visual as well as crossmodal visuotactile non-rhythmic and non-  
575 discrete stimulation, suggesting a generalizability of phase resets as a mechanism for temporal  
576 predictions to all forms of external stimulation. Taken together, our results provide important  
577 further insights into the neural mechanisms that might be utilized by the brain to predict the  
578 temporal onsets of upcoming events.

## 579 **Materials and Methods**

### 580 **Participants**

581 Twenty-three healthy volunteers (mean age  $\pm$  standard deviation (SD):  $27.13 \pm 4.30$   
582 years; 20 females; all right-handed) took part in the study. They gave informed written  
583 consent and were monetarily compensated with 13 €/hour for participation. All volunteers had  
584 normal or corrected-to-normal vision, normal touch, as well as no background of psychiatric  
585 or neurological disorder. The ethics committee of the Medical Association Hamburg approved  
586 the study protocol (PV5073), and the experiment was carried out in accordance with the  
587 approved guidelines and regulations.

588

### 589 **Experimental procedure**

590 The experimental paradigm used in the current study was adopted from an earlier report  
591 investigating visual temporal predictions in cerebellar patients (Roth et al., 2013). Our  
592 experiment consisted of three conditions: a *visual* temporal prediction task, a crossmodal  
593 (*tactile*) temporal prediction task, and a *luminance matching* (control) task. The trials of all  
594 conditions started with the presentation of a randomly generated, white noise occluder (size:  
595  $7.5^\circ \times 11.3^\circ$  (h x w)) that was smoothed with a Gaussian filter (imgaussfilt.m in MATLAB)  
596 and presented in the middle of the screen against a grey background screen (luminance: 44  
597  $\text{cd/m}^2$ ; corresponds to 115 red-green-blue (RGB) values in our setting; see Figure 1A). At the  
598 center of the occluder, a red fixation dot was presented. We instructed participants to fixate  
599 this dot throughout the entire trial. After 1500 ms, an oval stimulus (size:  $3.5^\circ \times 1.0^\circ$ ) set on in  
600 the periphery of the screen, moving towards the occluder with a speed of  $6.9^\circ/\text{s}$ . The  
601 luminance of the stimulus differed in all trials between 120 to 161  $\text{cd/m}^2$  (6 steps,  
602 counterbalanced, corresponds to 170 to 220 RGB). For half of the participants, the stimulus  
603 started on the left side of the occluder and moved from left side towards the right side. For the  
604 other half, the stimulus started on the right side and moved from right to left. The direction of  
605 movement was kept constant for each participant throughout the entire experiment. In each  
606 trial, the starting point of the stimulus differed such that the stimulus took 1,000 to 1,500 ms  
607 to disappear completely behind the occluder from starting point, randomly jittered with 100  
608 ms (counterbalanced). The size of the occluder and the speed of the stimulus were chosen so  
609 that the stimulus would need exactly 1,500 ms to reappear on the other side of the occluder.  
610 However, we manipulated the timing and the luminance of the reappearing stimulus. In each  
611 trial, the reappearance of the stimulus differed between  $\pm 17$  to  $\pm 467$  ms (randomly jittered,  
612 but counterbalanced in steps of 50 ms; corresponds to  $\pm 1$  to  $\pm 28$  frames with a jitter of 3  
613 frames at 60 Hz) from the correct reappearance time of 1,500 ms. Hence, the stimulus was  
614 covered by the occluder for 1,033 to 1,967 ms and was reappearing at 20 different time  
615 points. In the visual prediction task as well as in the luminance matching task, we also  
616 manipulated the luminance of the reappearing stimulus relative the luminance the stimulus  
617 had before disappearance in each trial (jittered, but counterbalanced between  $\pm 1$  to  $\pm 40$   $\text{cd/m}^2$ ,  
618 also using 20 different values; corresponds to  $\pm 1$  to  $\pm 28$  RGB in steps of 3 RGB to make it  
619 similar to the timing manipulation). After reappearance, the stimulus moved to the other side  
620 of the screen for 500 ms with the same speed until it set off the screen. The occluder was  
621 presented throughout the entire trial.

622 By manipulating the timing as well as the luminance in both conditions, we made sure  
623 that both, the visual temporal prediction as well as the luminance matching task had the exact  
624 equal physical appearance throughout all trials. They only differed in their cognitive set. In

625 the visual temporal prediction task, we asked participants to judge whether the stimulus was  
626 reappearing *too early* or *too late* based on the speed the stimulus had earlier to the occluder  
627 (which was kept constant throughout the entire experiment). In the luminance matching task,  
628 participants were asked to judge whether the luminance of the reappearing visual stimulus  
629 became *brighter* or *darker* as compared to the stimulus earlier to disappearance. Participants  
630 answered by pressing one of two buttons with their index or middle finger of the hand  
631 contralateral to the reappearing stimulus.

632 The tactile temporal prediction task was equal to the visual temporal prediction task, with  
633 the only difference that a tactile stimulus instead of a visual was presented at the time of  
634 reappearance to the right or left index finger (depending on which side the stimulus was  
635 expected to reappear behind the occluder). The tactile stimulus was presented by means of a  
636 Braille piezostimulator (QuaeroSys, Stuttgart, Germany; 2 x 4 pins, each 1 mm in diameter  
637 with a spacing of 2.5 mm), pushing up all eight pins for 200 ms. At that time, nothing  
638 happened on the screen. Participants gave their answer with the same hand as in the other two  
639 conditions (i.e., with the hand that was not stimulated by the Braille stimulator). Response  
640 mapping of the two buttons was counterbalanced across all participants. As soon as  
641 participants gave their answer, the fixation dot turned dark grey for 100 ms to indicate that the  
642 response was registered. However, participants did not receive trial-wise feedback about the  
643 correctness of their response. After a short delay of 200 ms, the white-noise occluder was  
644 randomly re-shuffled to signal the start of a new trial.

645 All three conditions were presented block-wise. At the beginning of each block,  
646 participants were informed about the current task. The order of presentation of the conditions  
647 was kept constant for each participant, but was randomized across participants  
648 (counterbalanced). At the end of each block, they were informed about the overall accuracy of  
649 their answers within the last block and were allowed to rest as long as they wanted. Each  
650 participant performed two sessions at two different recording days. The experimental  
651 procedure was kept constant across both sessions, i.e., movement direction, response  
652 mapping, as well as condition order did not change in the second session for individual  
653 participants. Each session comprised twelve blocks, i.e., four blocks per condition. Each  
654 block consisted of 60 trials, resulting in a total number of 480 trials per condition or 1,440  
655 trials in total. Due to technical difficulties, for one participant we only acquired data from one  
656 session with a total number of 720 trials.

657 At the beginning of each recording day, participants performed a short training of all  
658 conditions to get familiar with the overall experimental procedure and the stimulus material.  
659 This training took part in the same environment as the subsequent recording session. At the  
660 end of the second recording day, participants filled a questionnaire asking for any specific  
661 strategy they might have used for the temporal prediction task.

662 We used MATLAB R2014b (MathWorks, Natick, USA; RRID: SCR\_001622) and  
663 Psychtoolbox (Brainard, 1997) (RRID: SCR\_002881) on a Dell Precision T5500 with Ubuntu  
664 64-bit operating system (Version: 16.04.5 LTS) for stimulus presentation. The visual stimuli  
665 were projected onto a matte backprojection screen at 60 Hz with a resolution of  $1,920 \times 1,080$   
666 pixels positioned 65 cm in front of participants. To mask the sound of the Braille stimulator  
667 during tactile stimulation, we presented participants with auditory pink noise at sampling rate  
668 of 48 kHz and volume of 85 dB using MEG-compatible in-ear headphones (SRM-252S,  
669 STAX Limited, Fujimi, Japan) during all experimental blocks.

670

## 671 **Data acquisition and pre-processing**

672 MEG was recorded at a sampling rate of 1,200 Hz using a 275-channel whole-head  
673 system (CTF MEG International Services LP, Coquitlam, Canada) situated in a dimly lit,  
674 sound attenuated and magnetically shielded chamber. We additionally recorded electrical eye,  
675 muscle and cardiac activity with Ag/AgCl-electrodes in order to have a better estimate for  
676 endogenous artefacts. Online head localizations (Stolk et al., 2013) were used to navigate  
677 participants back to their original head position prior to the onset of a new experimental block  
678 if their movements exceeded five mm from their initial position. The initial head position  
679 from the first recording day was saved so that participants could be navigated back to their  
680 initial head position also during the second recording day. This assured comparable head  
681 positions of each participant across sessions. Five malfunctioning channels were either not  
682 recorded or excluded from further analysis for all participants. To further control for eye  
683 movement artifacts, eye movements were tracked with an MEG-compatible EyeLink 1000  
684 Long Range Mount system (SR Research, Osgoode, Canada).

685 We analyzed reaction time data using R (R Core Team, 2014) (RRID: SCR\_001905) and  
686 RStudio (RStudio Inc., Boston, USA; RRID: SCR\_000432). Trials with reaction times longer  
687 than three standard deviations were excluded from analysis. Due to the right-skewed nature of  
688 reaction times, reaction time data were first log-transformed and then standardized across all  
689 trials.

690 All other data were analyzed using MATLAB R2016b with FieldTrip (Oostenveld et al.,  
691 2011) (RRID: SCR\_004849), the MEG and EEG Toolbox Hamburg (METH, Guido Nolte;  
692 RRID: SCR\_016104), or custom made scripts. The physiological continuous recording of  
693 each session was first cut into epochs of variable length. Each trial was cut 1,250 ms earlier to  
694 stimulus movement onset and 1,250 ms after offset of the reappeared stimulus. Trial length  
695 therefore varied between 4,717 and 6,183 ms. To prevent that the timing in a given trial was  
696 not exactly as intended, e.g., by short movement interruptions of the stimulus, we removed  
697 trials which contained MEG marker timings that differed from the intended timing of the  
698 moving stimulus in the trial by at least one frame (17 ms). Thus, we excluded on average 1.2  
699 trials in each participant and each session (range: 0 – 24 trials).

700 Moreover, trials containing strong muscle artifacts or jumps were detected by semi-  
701 automatic procedures implemented in FieldTrip and excluded from analysis. The remaining  
702 trials were filtered with a high-pass filter at 0.5 Hz, a low-pass filter at 170 Hz, and three  
703 band-stop filters at 49.5–50.5 Hz, 99.5–100.5 Hz and 149.5–150.5 Hz and subsequently  
704 down-sampled to 400 Hz.

705 We performed an independent component analysis (infomax algorithm) to remove  
706 components containing eye-movements, muscle, and cardiac artefacts. Components were  
707 identified by visual inspection of their time course, variance across samples, power spectrum,  
708 and topography. On average,  $25.7 \pm 8.6$  components were rejected in each participant and  
709 each session. All trials were again visually inspected and trials containing artefacts that were  
710 not detected by the previous steps were removed.

711 As a final step, using procedures described by Stolk *et al.* (Stolk et al., 2013) and online  
712 ([http://www.fieldtriptoolbox.org/example/how\\_to\\_incorporate\\_head\\_movements\\_in\\_MEG\\_](http://www.fieldtriptoolbox.org/example/how_to_incorporate_head_movements_in_MEG_analysis/)  
713 [analysis/](http://www.fieldtriptoolbox.org/example/how_to_incorporate_head_movements_in_MEG_analysis/)) we identified trials in which the head position of the participant differed by 5 mm  
714 from the mean circumcenter of the head position from the whole session (on average: 2.6  
715 trials per participant and session, range: 0 – 86 trials) and excluded them from further  
716 analysis.  $670.2 \pm 26.7$  trials of the total of 720 trials remained from pre-processing on average  
717 per participant in each session.

## 718 Quantification and statistical analysis

719 In the current experiment, we introduced a control condition that was physically identical  
720 to our temporal prediction tasks (until reappearance in the tactile condition) in order to  
721 account for processes that are not directly related temporal predictions. Hence, for most of our  
722 statistical analyses, we were interested in comparing the two temporal prediction tasks with  
723 the luminance matching control task, respectively, and not in comparing the two temporal  
724 prediction tasks with each other. Therefore, instead of computing an analysis of variance  
725 across all three conditions, we directly computed two separate *t*-tests for the comparison of  
726 the visual or the tactile temporal prediction with the luminance matching task, respectively,  
727 and accounted for multiple comparisons by adjusting the alpha level.

### 728 *Psychometric curve*

729 We did not provide participants with feedback about the correctness of their response.  
730 Hence, participants responded within their individual framework of a “subjectively correct”  
731 reappearance timing or a “subjectively equal” luminance of the stimulus, respectively. To  
732 obtain these subjective points of “right-on-time” (ROT) in the temporal prediction tasks or the  
733 “points of subjective equality” (PSE) in the luminance matching task, we fitted a  
734 psychometric curve to the behavioral data of each participant from all trials in each condition.  
735 First, for each timing difference or luminance difference, respectively, we computed the  
736 proportion of “too late” or “brighter” answers for each participant. Then, we fitted a binomial  
737 logistic regression (psychometric curve) using the `glmfit.m` and `gmlval.m` functions provided  
738 in MATLAB. The fitted timing or luminance difference value at 50% proportion “too late” or  
739 “brighter” answers was determined as ROT or PSE for each participant, respectively. To test  
740 for a significant bias towards one of the answers, we tested the ROT or PSE from all  
741 participants against zero using one-sample *t*-tests ( $\alpha = .05 / 3 = .017$ ). The steepness of the  
742 psychometric function was computed as the reciprocal of the difference between fitted timing  
743 or luminance difference values at 75% and 25% proportion “too late” or “brighter” answers,  
744 respectively.

### 745 *Mixed regression model for reaction times*

746 To test whether reaction times were dependent on the timing difference of the  
747 reappearing stimulus, we fitted a random intercept and slope mixed model to reaction times  
748 from all trials using the categorical variable *condition* (with the luminance matching task as  
749 reference level) and *timing difference* as well as their interaction as fixed effects. Since in the  
750 temporal prediction conditions we expected reaction times to be slowest for timing  
751 differences around zero and faster for high timing differences, we used a second-order  
752 polynomial term for *timing differences*. Subject ID was used as grouping variable to model an  
753 individual intercept for each participant, and *timing difference* was modeled with random  
754 slope. We used R including the *lme4* package for computing the mixed-effect model, and the  
755 package *parameters* to compute p-values using the “Kenward” option, which estimates p-  
756 values for fixed effects using the Kenward-Roger approach (Kenward and Roger, 1997).

### 757 *Spectral power*

758 We decomposed the MEG recordings into time-frequency representations by convolving  
759 the data with complex Morlet’s wavelets (Cohen, 2014). The recording of each trial and  
760 channel was convolved with 40 complex wavelets, logarithmically spaced between 0.5 to 100  
761 Hz. With increasing frequency, the number of cycles for each wavelet logarithmically  
762 increased from two to ten cycles. For all analyses of the MEG data, we considered

763 subjectively correct trials only, i.e., trials in which participants answered correctly based on  
764 their individual ROT. To correct for trial count differences between the tasks, we stratified the  
765 number of trials for each participant for the three different conditions by randomly selecting  
766 as many trials for each condition as the number available from the condition with lowest trial  
767 count.

768 Since the temporal dependencies between the movement onset, disappearance behind the  
769 occluder and reappearance of the stimulus varied strongly between trials, averaging across  
770 trials would heavily smear the power estimates of the different stages within each trial. To  
771 obtain an estimate of spectral power modulations related to the different events in our  
772 experimental paradigm, we cut each trial further into four separate, partly overlapping  
773 windows (see Figure 2A): a “Baseline” window from -550 to -50 ms earlier to movement  
774 onset; a “Movement” window from -50 to 950 ms relative to the movement onset; a  
775 “Disappearance” window from -350 to 950 ms relative to complete disappearance of the  
776 stimulus behind the occluder; and a “Reappearance” window from -350 to 450 ms relative to  
777 the (first frame) reappearance of the stimulus. Spectral power estimates were then averaged  
778 across all trials belonging to the same condition in each window and binned into time  
779 windows of 100 ms (centered on each full deci-second). All power estimates were normalized  
780 using the pre-stimulus baseline window from -500 to -200 ms earlier to movement onset.

781 For all statistical analyses on sensor level, we first flipped all sensors of participants, who  
782 saw the stimulus moving from right to left, at the sagittal midline, i.e., the anterior-posterior  
783 axis. This made sure that lateralized activity due to the lateralized stimulation was comparable  
784 across groups. From this on, we considered all participants as if for everyone the stimulus was  
785 moving from the left to the right side. Channels that did not have a counterpart on the  
786 opposite site were excluded from further analyses. In order to obtain an overview of the  
787 spectral power modulations related to the different events within the trials, we then averaged  
788 the power estimates across all channels and conditions (grand average) and tested each time-  
789 frequency pair of the Movement, Disappearance and Reappearance windows against the pre-  
790 stimulus baseline using paired-sample *t*-tests. We controlled for multiple comparisons by  
791 employing cluster-based permutation statistics as implemented in FieldTrip (Maris and  
792 Oostenveld, 2007). In this procedure, neighboring time-frequency bins with an uncorrected *p*-  
793 value below 0.05 are combined into clusters, for which the sum of *t*-values is computed. A  
794 null-distribution is created through permutations of data across participants ( $n = 1,000$   
795 permutations), which defines the maximum cluster-level test statistics and corrected *p*-values  
796 for each cluster. For each window, a separate cluster-permutation test was performed ( $\alpha = .05$ ;  
797 liberally chosen to observe all ongoing power modulations; see Results section).

798 Since we were most interested in differences between the conditions during the  
799 disappearance time, we subsequently compared the spectral power estimates averaged within  
800 the beta range (13–30 Hz; see Results section) at each time point within the disappearance  
801 window and all channels from the visual or tactile temporal prediction task with the  
802 luminance matching task. We again employed cluster-permutation statistics, this time by  
803 clustering neighboring channels and time points. We used a one-sided  $\alpha = .025 / 2 = .0125$ ,  
804 since negative and positive clusters were tested separately, and to adjust for the two separate  
805 comparisons between the conditions (used throughout the study unless stated differently).

806 To estimate spectral power in source space, we computed separate leadfields for each  
807 recording session and participant based on each participant’s mean head position in each  
808 session and individual magnetic resonance images. We used the single-shell volume  
809 conductor model (Nolte, 2003) with a 5,003 voxel grid that was aligned to the MNI152  
810 template brain (Montreal Neurological Institute, MNI; <http://www.mni.mcgill.ca>) as  
811 implemented in the MEG toolbox. Cross-spectral density (CSD) matrices were computed  
812 from the complex wavelet convolved data in steps of 100 ms in the same time windows as



813 outlined above. To avoid biases in source projection, common adaptive linear spatial filters  
814 (DICS beamformer (Gross et al., 2001)) pointing into the direction of maximal variance were  
815 computed from CSD matrices averaged across all time bins and conditions for each  
816 frequency.

817 All time-frequency resolved CSD matrices were then multiplied with the spatial filters to  
818 estimate spectral power in each of the 5,003 voxels and normalized with the pre-stimulus  
819 baseline window. Analogous to sensor space, we first flipped all voxels at the y-axis  
820 (anterior-posterior axis) for the half of participants that saw the stimulus moving from right to  
821 left earlier to further statistical analysis. We then averaged across all time bins within the  
822 disappearance window and utilized cluster-based permutation statistics to identify clusters of  
823 voxels that show statistical difference in beta power between each of the temporal prediction  
824 tasks and the luminance matching task.

### 825 *Inter-trial phase consistency*

826 We computed ITPC estimates from the complex time-frequency representations obtained  
827 from the wavelet convolution as described in the *Spectral power* section above. In each time  
828 sample and trial, the phase of the complex data was extracted (using the function `angle.m` in  
829 MATLAB). ITPC was then computed across all subjectively correct and stratified trials  
830 within each of the four time windows in all frequencies as

$$831 \quad ITPC_{tf} = \left| n^{-1} \sum_{r=1}^n e^{ik_{tfr}} \right|$$

832 where  $n$  is the number of trials and  $k$  the phase angle in trial  $r$  at time-frequency point  $tf$   
833 (Cohen, 2014). In other words, ITPC is the length of the mean vector from all phase vectors  
834 with length 1 across all trials at a given time-frequency point. Values for ITPC can vary  
835 between 0 and 1, where 0 means that at a given time-frequency point there is no phase  
836 consistency across trials at all and 1 means all trials show the exact same phase. Similar to  
837 spectral power, we averaged ITPC estimates again in bins of 100 ms and plotted all time  
838 windows averaged across all channels and conditions to obtain a general overview of ITPC  
839 estimates at all events during the trial.

840 Since we were most interested in ITPC related to stimulus disappearance behind the  
841 occluder, we subsequently computed ITPC in a longer time window from -1,900 ms to 1,900  
842 ms centered around time of complete stimulus disappearance behind the occluder. Thus, we  
843 took advantage of the fact that the onset of other events within each trial, such as the  
844 movement onset and the reappearance of the stimulus, strongly jittered across all trials and  
845 strong contributions of these events to ITPC could thereby be reduced (see Fig. S3). For  
846 statistical analysis, we first averaged ITPC estimates within a frequency band of 0.5 to 3 Hz  
847 (see Results) and then computed cluster-based permutation statistics across all 100 ms time  
848 bins within the 3,800 ms long window and all sensors between each of the temporal  
849 prediction tasks and the luminance matching task.

850 ITPC on source level was computed using the same leadfields and common beamformer  
851 filters as for spectral power (see above). The complex time-frequency representations  
852 obtained from the wavelet convolution within the 3,800 ms long window on sensor level were  
853 multiplied with the filters to obtain the time-frequency representations in each of the 5,003  
854 voxels. ITPC was computed for each time sample and frequency and then averaged within the  
855 time window showing statistically significant difference between the temporal prediction  
856 tasks and the luminance matching task on sensor level and within the pre-defined frequency  
857 band of 0.5 to 3 Hz. Cluster-based permutation statistics were employed to identify clusters of

858 voxels showing statistically significant differences in ITPC between the conditions on source  
859 level.

860 Correlations between condition-wise source level ITPC estimates and the steepness of  
861 each individual's psychometric function were computed using Pearson correlations in each of  
862 the 5,003 voxels within the grid. For this analysis, we averaged ITPC estimates from time  
863 bins of 0 to 1,000 ms with respect to the disappearance of the stimulus within the pre-defined  
864 delta band of 0.5 to 3 Hz. Multiple comparisons were accounted for by using cluster-based  
865 permutation statistics as implemented in FieldTrip ( $\alpha = .025 / 3 = .008$ )

### 866 *Delta power control analyses and mixed models*

867 For control analyses of delta power differences between the conditions, we computed  
868 delta power using the same wavelet convolution approach as described for ITPC for the  
869 enlarged time windows between -1,900 ms to 1,900 ms locked to stimulus disappearance. To  
870 obtain total delta power, we computed power in each single trial first and then averaged  
871 power within the delta band (0.5 – 3 Hz) and the respective channels showing the strongest  
872 ITPC effect (see Fig. 3D) for each time bin and condition. Induced power was obtained by  
873 first averaging all trials in each condition and channel in the time domain, i.e., by computing  
874 an ERF in each channel and condition, and then subtracting this average from all single trials  
875 in each channel and condition separately. After subtracting the ERF, power was estimated as  
876 described for total power above. Delta power of the ERF itself was estimated by applying a  
877 wavelet convolution to the ERF, i.e., the average across trials, in each condition and channel  
878 and subsequently averaging power estimates within the delta band and the respective  
879 channels. All time courses were baseline corrected with a pre-disappearance window of -  
880 1,500 to -500 ms relative to disappearance in each condition.

881 To further examine the effect of delta power on ITPC, we computed random intercept  
882 and random slope mixed-effects models using *condition* and *time* as well as their interaction  
883 as fixed effects for predicting ITPC. One model also included delta power as an additional  
884 covariate, the other one did not. We first averaged delta ITPC as well as delta power (0.5 – 3  
885 Hz) from each condition and each time bin (-1.900 ms – 1.900 ms) within the channels  
886 showing the strongest effect for ITPC (see Fig. 3D). ITPC as well as the baseline-corrected  
887 power values were standardized across all data for an easier interpretation of the model  
888 estimates. *Subject ID* was used as grouping variable to model an individual intercept for each  
889 participant, and *time* was modeled as random slope. To ensure a flexible relationship between  
890 time and ITPC, we modeled *time* using natural cubic splines with 10 degrees of freedom. For  
891 plotting, we computed ITPC values as predicted by the interaction between *condition* and  
892 *time* and back-transformed the values to the original scale for an easier evaluation. As for the  
893 reaction time model, we used R including the *lme4* package for computing the mixed-effect  
894 model, the package *parameters* to compute p-values using the “Kenward” option, as well as  
895 the package *splines* for generating the natural cubic splines.

### 896 **Acknowledgements**

897 We thank Florian Göschl, Tessa Rusch, Marina Fiene and Guido Nolte for valuable  
898 discussions. This work was funded by grants from the DFG (SFB TRR 169/B1 and SFB  
899 936/A3 to A.K.E.).

900 **Author contributions**

901 Conceptualization, J.D., A.K.E, P.W., A.M.; Methodology, J.D., A.K.E.; Software, J.D.;  
902 Formal Analysis, J.D.; Investigation, J.D.; Writing – Original Draft, J.D.; Writing – Review  
903 & Editing, A.K.E., P.W., A.M., D.Z.; Visualization, J.D.; Funding Acquisition, A.K.E.;  
904 Supervision, A.K.E.; Project Administration, A.K.E., D.Z.; Resources, A.K.E.

905 **Competing interests**

906 The authors declare no competing interests.

907 **Data availability**

908 Custom scripts and data will be made available upon full submission of the manuscript.

909

## 910 **References**

- 911 Arnal, L.H., and Giraud, A.L. (2012). Cortical oscillations and sensory predictions. *Trends*  
912 *Cogn. Sci.* *16*, 390–398. doi: 10.1016/j.tics.2012.05.003.
- 913 Arnal, L.H., Doelling, K.B., and Poeppel, D. (2015). Delta-beta coupled oscillations underlie  
914 temporal prediction accuracy. *Cereb. Cortex* *25*, 3077–3085. doi: 10.1093/cercor/bhu103.
- 915 Besle, J., Schevon, C.A., Mehta, A.D., Lakatos, P., Goodman, R.R., McKhann, G.M.,  
916 Emerson, R.G., and Schroeder, C.E. (2011). Tuning of the human neocortex to the  
917 temporal dynamics of attended events. *J. Neurosci.* *31*, 3176–3185. doi:  
918 10.1523/JNEUROSCI.4518-10.2011.
- 919 Brainard, D.H. (1997). The psychophysics toolbox. *Spat. Vis.* *10*, 433–436.
- 920 Breska, A., and Deouell, L.Y. (2017a). Neural mechanisms of rhythm-based temporal  
921 prediction: delta phase-locking reflects temporal predictability but not rhythmic  
922 entrainment. *PLOS Biol.* *15*, e2001665. doi: 10.1371/journal.pbio.2001665.
- 923 Breska, A., and Deouell, L.Y. (2017b). Dance to the rhythm, cautiously: isolating unique  
924 indicators of oscillatory entrainment. *PLOS Biol.* *15*, e2003534. doi:  
925 10.1371/journal.pbio.2003534.
- 926 Breska, A., and Ivry, R.B. (2016). Taxonomies of timing: where does the cerebellum fit in?  
927 *Curr. Opin. Behav. Sci.* *8*, 282–288. doi: 10.1016/j.cobeha.2016.02.034.
- 928 Buzsáki, G. (2006). *Rhythms of the brain* (New York: Oxford University Press.).
- 929 Cohen, M. (2014). *Analyzing neural time series data: theory and practice* (Cambridge: MIT  
930 Press).
- 931 Coull, J.T., and Nobre, A.C. (2008). Dissociating explicit timing from temporal expectation  
932 with fmri. *Curr. Opin. Neurobiol.* *18*, 137–144. doi: 10.1016/j.conb.2008.07.011.
- 933 Cravo, A.M., Rohenkohl, G., Wyart, V., and Nobre, A.C. (2013). Temporal expectation  
934 enhances contrast sensitivity by phase entrainment of low-frequency oscillations in visual  
935 cortex. *J. Neurosci.* *33*, 4002–4010. doi: 10.1523/JNEUROSCI.4675-12.2013.
- 936 Doelling, K.B., and Poeppel, D. (2015). Cortical entrainment to music and its modulation by  
937 expertise. *Proc. Natl. Acad. Sci.* *112*, E6233–E6242. doi: 10.1073/pnas.1508431112.
- 938 Doelling, K.B., Assaneo, M.F., Bevilacqua, D., Pesaran, B., and Poeppel, D. (2019). An  
939 oscillator model better predicts cortical entrainment to music. *Proc. Natl. Acad. Sci.*  
940 201816414. doi: 10.1073/pnas.1816414116.
- 941 van Ede, F., de Lange, F., Jensen, O., and Maris, E. (2011). Orienting attention to an  
942 upcoming tactile event involves a spatially and temporally specific modulation of  
943 sensorimotor alpha- and beta-band oscillations. *J. Neurosci.* *31*, 2016–2024. doi:  
944 10.1523/JNEUROSCI.5630-10.2011.
- 945 Engel, A.K., Fries, P., and Singer, W. (2001). Dynamic predictions: oscillations and  
946 synchrony in top-down processing. *Nat. Rev. Neurosci.* *2*, 704–716. doi:  
947 10.1038/35094565.
- 948 Fries, P. (2005). A mechanism for cognitive dynamics: neuronal communication through  
949 neuronal coherence. *Trends Cogn. Sci.* *9*, 474–480. doi: 10.1016/j.tics.2005.08.011.
- 950 Giraud, A.-L., and Poeppel, D. (2012). Cortical oscillations and speech processing: emerging  
951 computational principles and operations. *Nat. Neurosci.* *15*, 511–517. doi:  
952 10.1038/nn.3063.

- 953 Gomez-Ramirez, M., Kelly, S.P., Molholm, S., Sehatpour, P., Schwartz, T.H., and Foxe, J.J.  
954 (2011). Oscillatory sensory selection mechanisms during intersensory attention to  
955 rhythmic auditory and visual inputs: a human electrocorticographic investigation. *J.*  
956 *Neurosci.* *31*, 18556–18567. doi: 10.1523/JNEUROSCI.2164-11.2011.
- 957 Gould, I.C., Rushworth, M.F., and Nobre, A.C. (2011). Indexing the graded allocation of  
958 visuospatial attention using anticipatory alpha oscillations. *J. Neurophysiol.* *105*, 1318–  
959 1326. doi: 10.1152/jn.00653.2010.
- 960 Gross, J., Kujala, J., Hamalainen, M., Timmermann, L., Schnitzler, A., and Salmelin, R.  
961 (2001). Dynamic imaging of coherent sources: studying neural interactions in the human  
962 brain. *Proc. Natl. Acad. Sci.* *98*, 694–699. doi: 10.1073/pnas.98.2.694.
- 963 Herbst, S.K., and Obleser, J. (2019). Implicit temporal predictability enhances pitch  
964 discrimination sensitivity and biases the phase of delta oscillations in auditory cortex.  
965 *Neuroimage* *203*, 116198. doi: 10.1016/j.neuroimage.2019.116198.
- 966 Kenward, M.G., and Roger, J.H. (1997). Small sample inference for fixed effects from  
967 restricted maximum likelihood. *Biometrics* doi: 10.2307/2533558.
- 968 Kösem, A., Bosker, H.R., Takashima, A., Meyer, A., Jensen, O., and Hagoort, P. (2018).  
969 Neural entrainment determines the words we hear. *Curr. Biol.* *28*, 2867–2875.e3. doi:  
970 10.1016/j.cub.2018.07.023.
- 971 Lakatos, P., Chen, C.-M., O’Connell, M.N., Mills, A., and Schroeder, C.E. (2007). Neuronal  
972 oscillations and multisensory interaction in primary auditory cortex. *Neuron* *53*, 279–292.  
973 doi: 10.1016/j.neuron.2006.12.011.
- 974 Lakatos, P., Karmos, G., Mehta, A.D., Ulbert, I., and Schroeder, C.E. (2008). Entrainment of  
975 neuronal oscillations as a mechanism of attentional selection. *Science* *320*, 110–113. doi:  
976 10.1126/science.1154735.
- 977 Macar, F., Vidal, F., and Casini, L. (1999). The supplementary motor area in motor and  
978 sensory timing: evidence from slow brain potential changes. *Exp. Brain Res.* *125*, 271–  
979 280. doi: 10.1007/s002210050683.
- 980 Maris, E., and Oostenveld, R. (2007). Nonparametric statistical testing of EEG- and MEG-  
981 data. *J. Neurosci. Methods* *164*, 177–190. doi: 10.1016/j.jneumeth.2007.03.024.
- 982 Mercier, M.R., Foxe, J.J., Fiebelkorn, I.C., Butler, J.S., Schwartz, T.H., and Molholm, S.  
983 (2013). Auditory-driven phase reset in visual cortex: human electrocorticography reveals  
984 mechanisms of early multisensory integration. *Neuroimage* *79*, 19–29. doi:  
985 10.1016/j.neuroimage.2013.04.060.
- 986 Nolte, G. (2003). The magnetic lead field theorem in the quasi-static approximation and its  
987 use for magnetoencephalography forward calculation in realistic volume conductors.  
988 *Phys. Med. Biol.* *48*, 3637–3652. doi: 10.1088/0031-9155/48/22/002.
- 989 Novembre, G., and Iannetti, G.D. (2018). Tagging the musical beat: neural entrainment or  
990 event-related potentials? *Proc. Natl. Acad. Sci.* *115*, E11002–E11003. doi:  
991 10.1073/pnas.1815311115.
- 992 Obleser, J., Henry, M.J., and Lakatos, P. (2017). What do we talk about when we talk about  
993 rhythm? *PLOS Biol.* *15*, e2002794. doi: 10.1371/journal.pbio.2002794.
- 994 Oostenveld, R., Fries, P., Maris, E., and Schoffelen, J.-M. (2011). FieldTrip: Open source  
995 software for advanced analysis of MEG, EEG, and invasive electrophysiological data.  
996 *Comput. Intell. Neurosci.* *2011*, 1–9. doi: 10.1155/2011/156869.
- 997 Pfeuty, M., Ragot, R., and Pouthas, V. (2003). When time is up: cnv time course

- 998 differentiates the roles of the hemispheres in the discrimination of short tone durations.  
999 *Exp. Brain Res.* *151*, 372–379. doi: 10.1007/s00221-003-1505-6.
- 1000 Praamstra, P., Kourtis, D., Kwok, H.F., and Oostenveld, R. (2006). Neurophysiology of  
1001 implicit timing in serial choice reaction-time performance. *J. Neurosci.* *26*, 5448–5455.  
1002 doi: 10.1523/JNEUROSCI.0440-06.2006.
- 1003 R Core Team (2014). R: a language and environment for statistical computing. R Found. Stat.  
1004 Comput. Vienna Austria.
- 1005 Rimmele, J.M., Morillon, B., Poeppel, D., and Arnal, L.H. (2018). Proactive sensing of  
1006 periodic and aperiodic auditory patterns. *Trends Cogn. Sci.* *22*, 870–882. doi:  
1007 10.1016/j.tics.2018.08.003.
- 1008 Rohenkohl, G., and Nobre, A.C. (2011). Alpha oscillations related to anticipatory attention  
1009 follow temporal expectations. *J. Neurosci.* *31*, 14076–14084. doi:  
1010 10.1523/JNEUROSCI.3387-11.2011.
- 1011 Roth, M.J., Synofzik, M., and Lindner, A. (2013). The cerebellum optimizes perceptual  
1012 predictions about external sensory events. *Curr. Biol.* *23*, 930–935. doi:  
1013 10.1016/j.cub.2013.04.027.
- 1014 Saleh, M., Reimer, J., Penn, R., Ojakangas, C.L., and Hatsopoulos, N.G. (2010). Fast and  
1015 slow oscillations in human primary motor cortex predict oncoming behaviorally relevant  
1016 cues. *Neuron* *65*, 461–471. doi: 10.1016/j.neuron.2010.02.001.
- 1017 Samaha, J., Bauer, P., Cimaroli, S., and Postle, B.R. (2015). Top-down control of the phase of  
1018 alpha-band oscillations as a mechanism for temporal prediction. *Proc. Natl. Acad. Sci.*  
1019 *112*, 8439–8444. doi: 10.1073/pnas.1503686112.
- 1020 Schroeder, C.E., and Lakatos, P. (2009). Low-frequency neuronal oscillations as instruments  
1021 of sensory selection. *Trends Neurosci.* *32*, 9–18. doi: 10.1016/j.tins.2008.09.012.
- 1022 Stefanics, G., Hangya, B., Hernádi, I., Winkler, I., Lakatos, P., Ulbert, I., Hernadi, I.,  
1023 Winkler, I., Lakatos, P., and Ulbert, I. (2010). Phase entrainment of human delta  
1024 oscillations can mediate the effects of expectation on reaction speed. *J. Neurosci.* *30*,  
1025 13578–13585. doi: 10.1523/JNEUROSCI.0703-10.2010.
- 1026 Stolk, A., Todorovic, A., Schoffelen, J.-M., and Oostenveld, R. (2013). Online and offline  
1027 tools for head movement compensation in MEG. *Neuroimage* *68*, 39–48. doi:  
1028 10.1016/j.neuroimage.2012.11.047.
- 1029 VanRullen, R. (2016). Perceptual cycles. *Trends Cogn. Sci.* *20*, 723–735. doi:  
1030 10.1016/j.tics.2016.07.006.
- 1031 Wilsch, A., Henry, M.J., Herrmann, B., Maess, B., and Obleser, J. (2015). Slow-delta phase  
1032 concentration marks improved temporal expectations based on the passage of time.  
1033 *Psychophysiology* *52*, 910–918. doi: 10.1111/psyp.12413.
- 1034 Zoefel, B., ten Oever, S., and Sack, A.T. (2018). The involvement of endogenous neural  
1035 oscillations in the processing of rhythmic input: more than a regular repetition of evoked  
1036 neural responses. *Front. Neurosci.* *12*, 1–13. doi: 10.3389/fnins.2018.00095.
- 1037
